# Supplementary material for: Aggregation-induced enhanced emission-type cruciform luminophore constructed by carbazole exhibiting mechanical force-induced luminescent enhancement and chromism
Source: Royal Society of Chemistry journal article supplement (doi:10.1039/d0ra00283f), 2020-01-01
Supplement: d0ra00283f1.pdf [file d0ra00283f1.pdf]

## Supporting Information for

### **Aggregation-induced enhanced emission-type cruciform luminophore constructed by carbazole exhibiting mechanical force-induced luminescent enhancement and chromism**

Defang Xu,<sup>†a</sup> Ying Wang,<sup>†b</sup> Li Li,<sup>c</sup> Hongke Zhou,<sup>b</sup> Xingliang Liu<sup>b\*</sup>

<sup>a</sup>State Key Laboratory of Plateau Ecology and Agriculture, Qinghai University,  
Xining 810016, Qinghai, China

<sup>b</sup>School of Chemical Engineering, Qinghai University, Xining 810016, Qinghai,  
China

<sup>c</sup>State Key Laboratory of Inorganic Synthesis and Preparative Chemistry, Department  
of Chemistry, Jilin University, Changchun 130012, Jilin, China.

E-mail address: liuxl1219@163.com.

<sup>†</sup>These authors contributed equally to this work.

**Table S1.** Electrochemical data and HOMO/LUMO energy levels of **MDCS-BC**.

| Compound       | $E_{\text{ox}}^a$ (V) | HOMO <sup>b</sup> (eV) | LUMO <sup>c</sup> (eV) | $E_g^d$ (eV) |
|----------------|-----------------------|------------------------|------------------------|--------------|
| <b>MDCS-BC</b> | 1.15                  | -5.49                  | -2.57                  | 2.92         |

<sup>a</sup>Oxidation potential was decided with Ag/Ag<sup>+</sup> electrode as reference.

<sup>b</sup>HOMO energy levels was obtained by comparing with an external reference, the ferrocene/ferrocenium (Fc/Fc<sup>+</sup>, 4.8 eV relative to vacuum).

<sup>c</sup>The LUMO energy level was estimated by the equation:  $E_{\text{LUMO}} = E_{\text{HOMO}} + E_g$ .

<sup>d</sup> $E_g$  was estimated from the onset of the absorption spectra ( $E_g = 1240/\lambda_{\text{onset}}$ ).

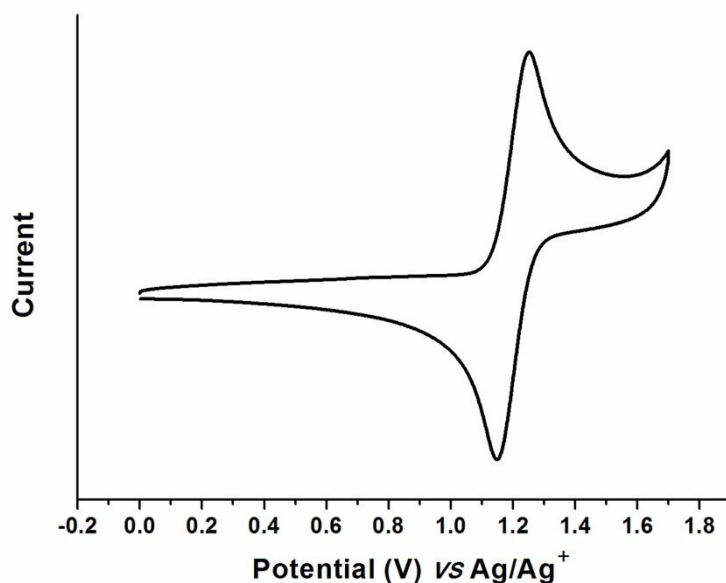**Fig. S1** Cyclic voltammogram of **MDCS-BC** measured in DCM with tetrabutylammonium hexafluorophosphate (0.1 mol/L) as electrolyte at a scan rate of 50 mV/s.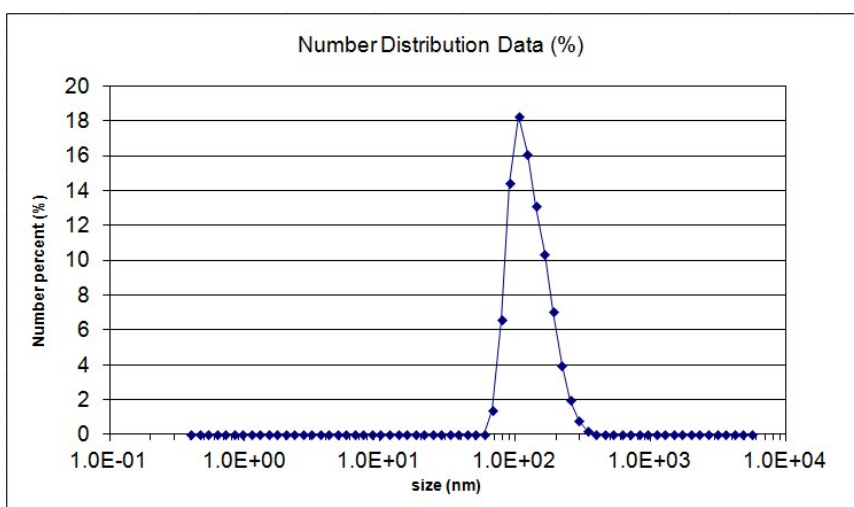**Fig. S2** DLS data of **MDCS-BC** ( $1.0 \times 10^{-5}$  mol L<sup>-1</sup>) in THF/water ( $f_w = 95\%$ ).

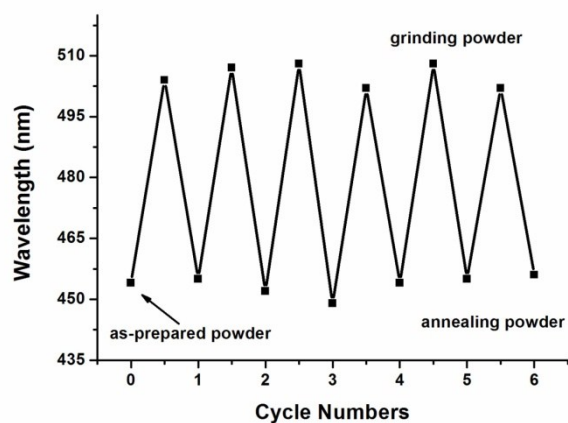

**Fig. S3** Maximum fluorescent emissions of **MDCS-BC** (at 230 °C ) upon repeating treated by grinding and heating.

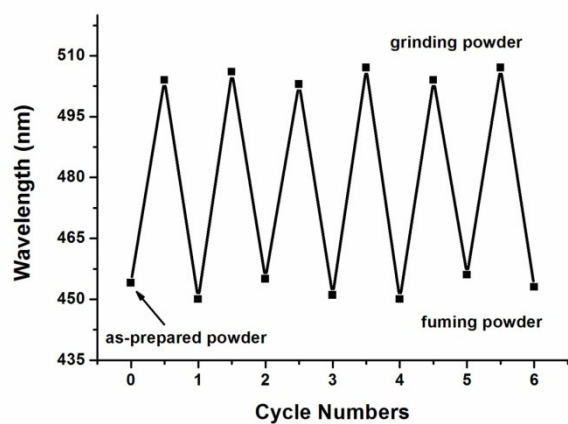

**Fig. S4** Maximum fluorescent emissions of **MDCS-BC** upon repeating treated by grinding and fuming with DCM.

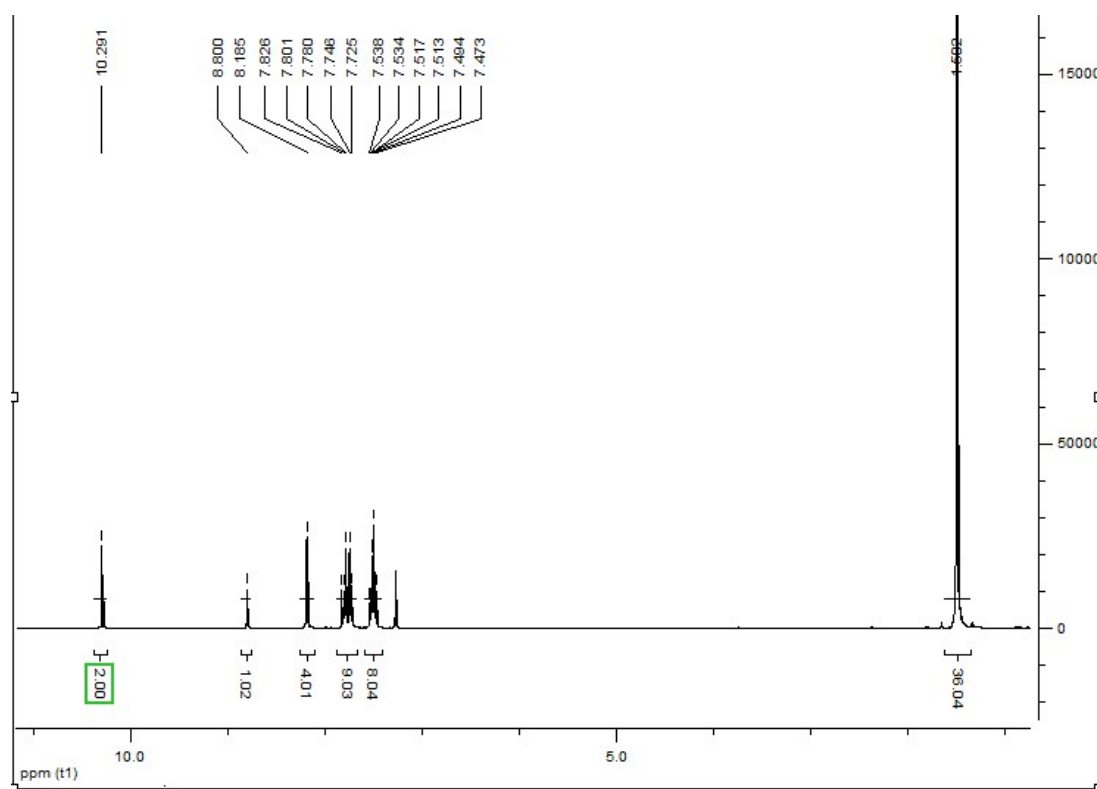

**Fig. S5**  $^1\text{H}$  NMR (400 MHz) spectrum of **3**

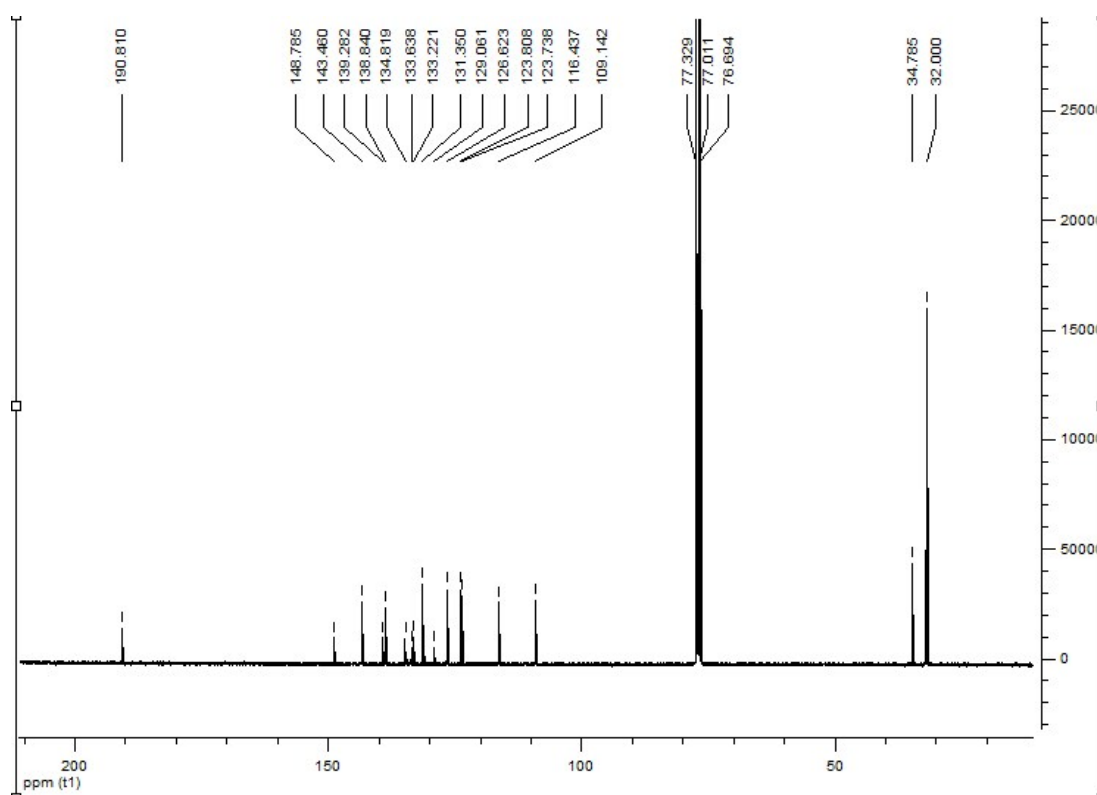

**Fig. S6**  $^{13}\text{C}$  NMR (100 MHz) spectrum of **3**

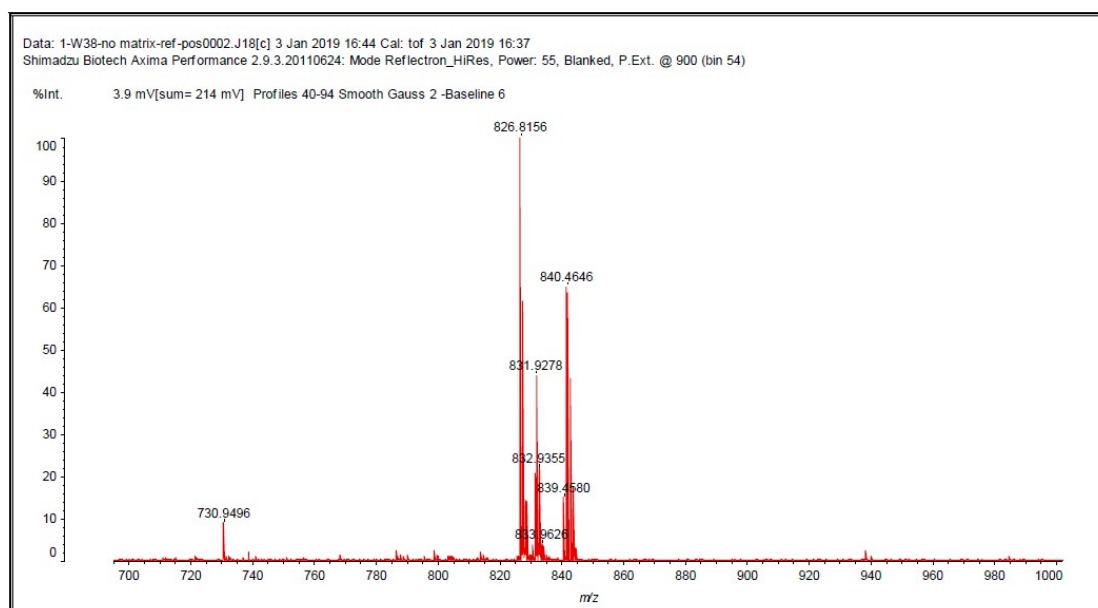

**Fig. S7** MALDI/TOF MS spectrum of **3**.

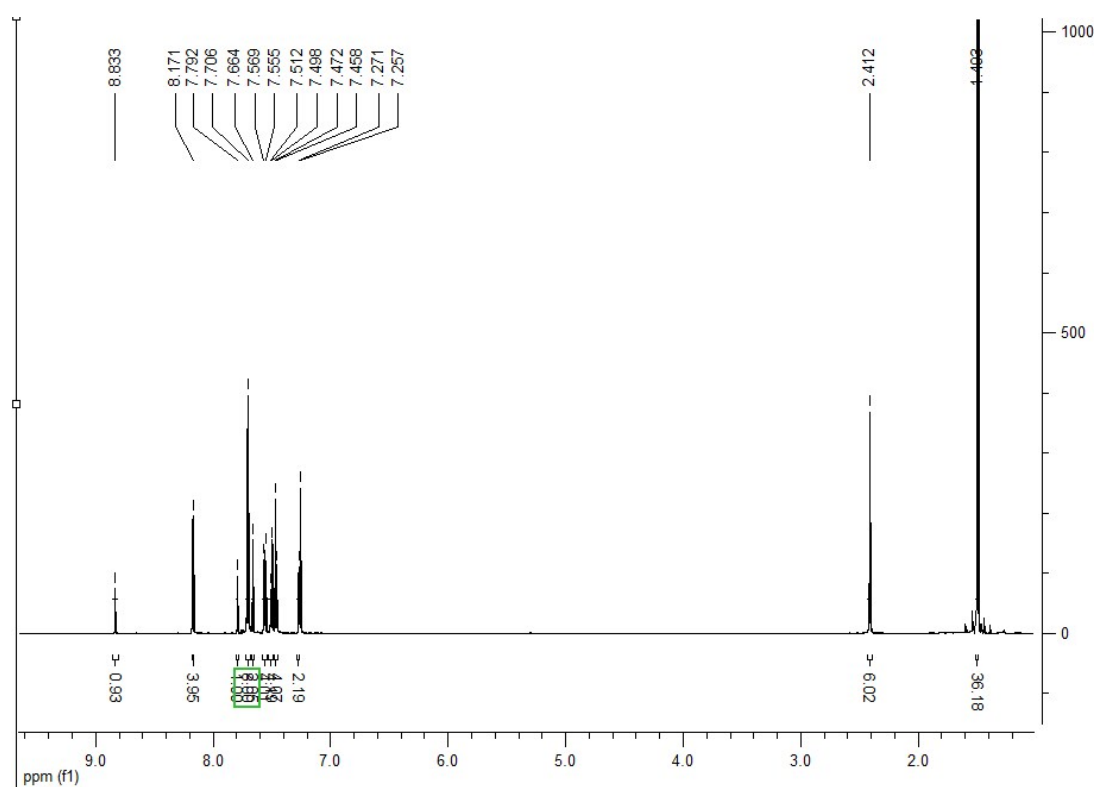

**Fig. S8**  $^1\text{H}$  NMR (600 MHz) spectrum of **MDCS-BC**.

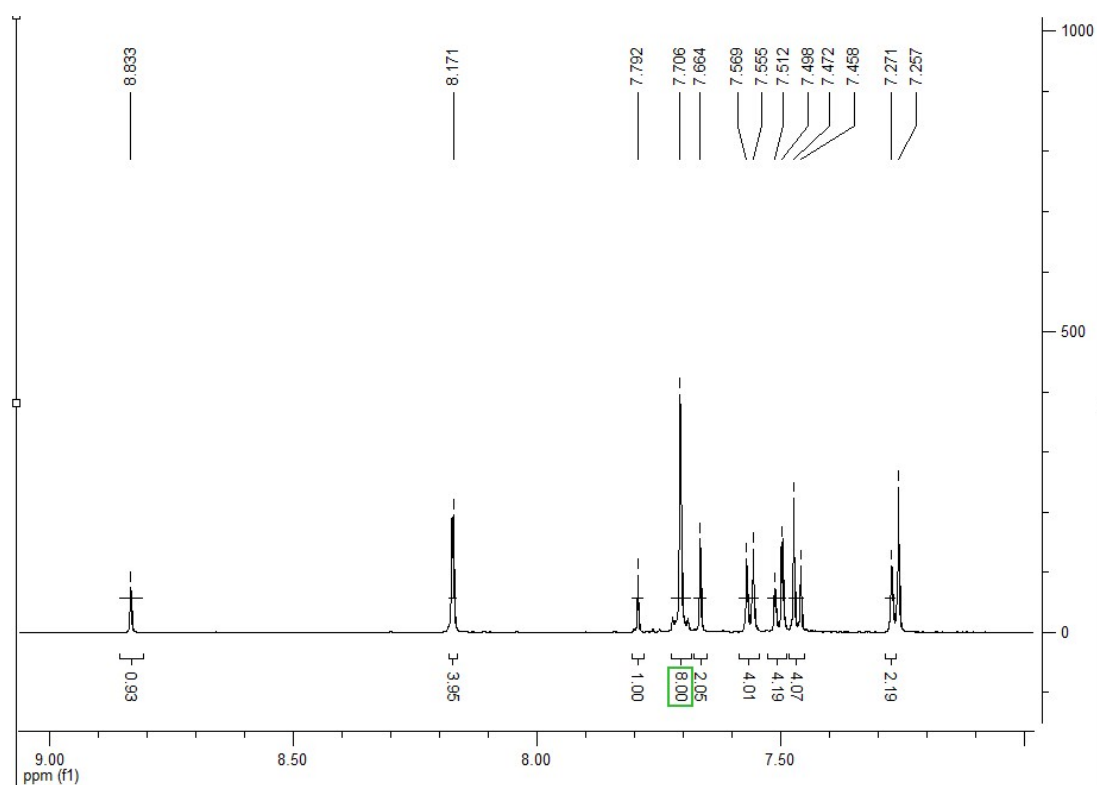

**Fig. S9** <sup>1</sup>H NMR (600 MHz) spectrum of **MDCS-BC**.

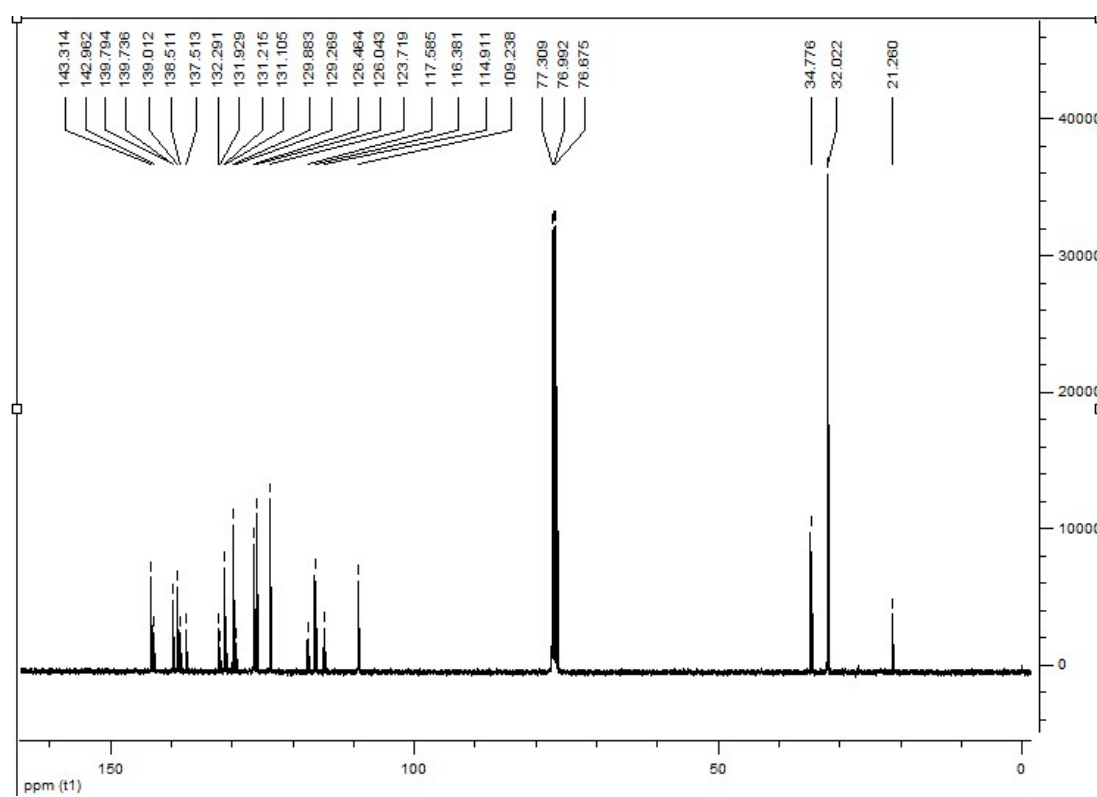

**Fig. S10** <sup>13</sup>C NMR (150 MHz) spectrum of **MDCS-BC**.

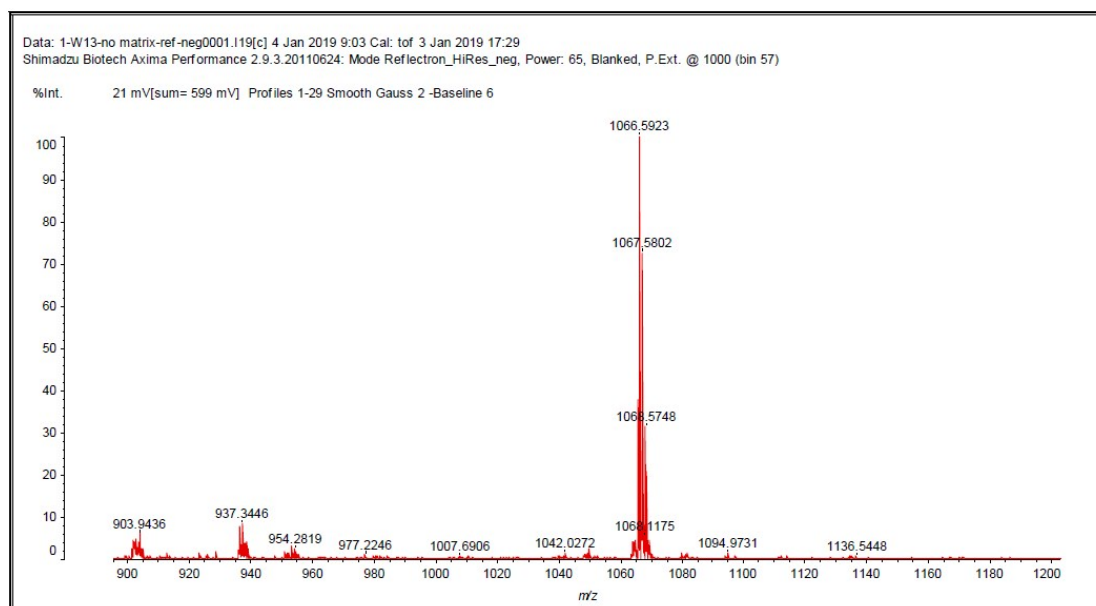

**Fig. S11** MALDI/TOF MS spectrum of **MDCS-BC**.

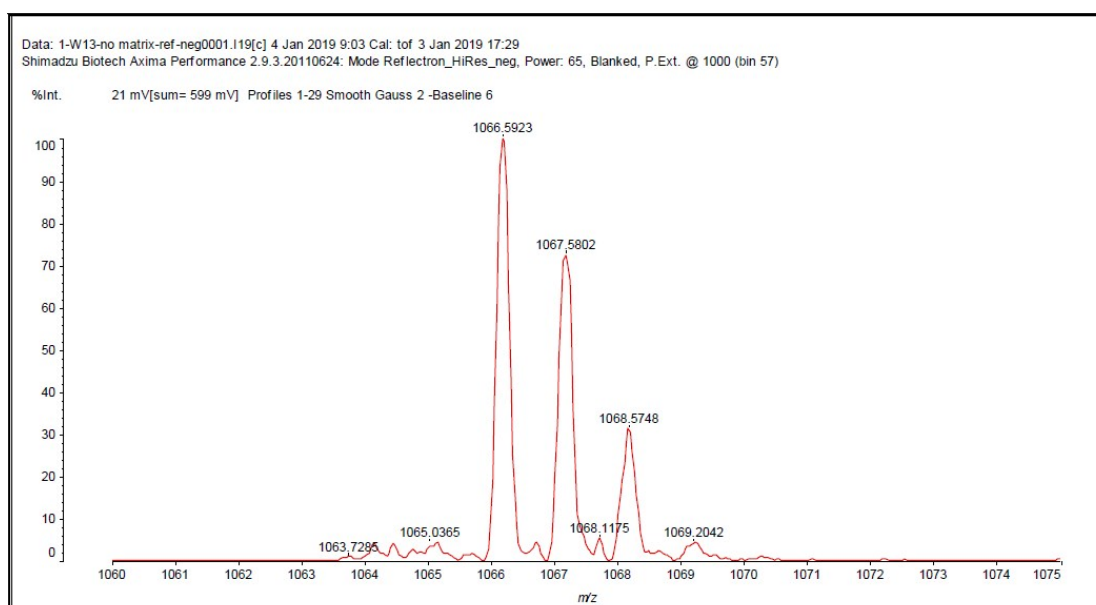

**Fig. S12** MALDI/TOF MS spectrum of **MDCS-BC**.
